# Supplementary material for: When microplastics meet electroanalysis: future analytical trends for an emerging threat
Source: Royal Society of Chemistry journal article supplement (doi:10.1039/d3ay01448g), 2023-01-01
Supplement: d3ay01448g1.pdf [file d3ay01448g1.pdf]

## Electronic supplementary information

### When microplastics meet electroanalysis: future analytical trends for an emerging threat

Mónica Mosquera-Ortega<sup>a,b</sup>, Lucas Rodrigues de Sousa<sup>a,c</sup>, Sabina Susmel<sup>d</sup>,  
Eduardo Cortón<sup>a,e</sup>, Federico Figueredo<sup>a†</sup>

†Corresponding author

Laboratory of Biosensors and Bioanalysis (LABB), Department of Biological Chemistry and IQUIBICEN, Faculty of Sciences, University of Buenos Aires and CONICET, Ciudad Universitaria, Buenos Aires (1428), Argentina. E-mail:

[federicofigueredo@qb.fcen.uba.ar](mailto:federicofigueredo@qb.fcen.uba.ar)

<sup>a</sup>Laboratory of Biosensors and Bioanalysis (LABB), Department of Biological Chemistry and IQUIBICEN, Faculty of Sciences, University of Buenos Aires and CONICET, Ciudad Universitaria, Buenos Aires (1428), Argentina

<sup>b</sup>Basic Science Department, Faculty Regional General Pacheco, National Technological University, Argentina

<sup>c</sup>Chemistry Institute, Federal University of Goias, Campus Samambaia, Goiania, Brazil

<sup>d</sup>Department of Agricultural, Food, Environmental and Animal Sciences (Di4A), University of Udine, Via Sondrio 2/A, 33100 Udine, Italy

<sup>e</sup>Department of Biosciences and Bioengineering, Indian Institute of Technology at Guwahati, Assam, India

**Table 1.** Recent studies reporting the use of spectrophotometric methods for the identification and quantification of MPs.

| Type of analysis                | Sample                                       | Size ( $\mu\text{m}$ ) | MPs analyzed                     | Observations                                                                                                          | Complications                                                                                                                            | Ref |
|---------------------------------|----------------------------------------------|------------------------|----------------------------------|-----------------------------------------------------------------------------------------------------------------------|------------------------------------------------------------------------------------------------------------------------------------------|-----|
| $\mu$ -FTIR(T)                  | Soil                                         | > 33                   | PE, PP, PS, PA, PVC and PET      | 3 h for sample preparation and 20 min for identification                                                              | Sample pretreatment is crucial                                                                                                           | 1   |
| $\mu$ -FTIR(T)                  | Soil                                         | 10 - 400               | PE, PA, PET and PVC              | Oxidative enzymatic methods for sample preparation                                                                    | MPs require pretreatment, purification and clean-up                                                                                      | 2   |
| $\mu$ -FTIR(ATR)                | Sand                                         | $\geq 20$              | PE, PP, PS, PA and PVC           | Peroxidation via $\text{H}_2\text{O}_2$ and density separation with NaCl                                              | 60% spectral matching by diffuse reflexion                                                                                               | 3   |
| $\mu$ -FTIR(ATR)                | Fresh water                                  | 200                    | PE, PP, PS and PA                | Digestion with $\text{H}_2\text{O}_2$ + KOH. 70% error in determinations                                              | 7 days of pretreatment and clean-up                                                                                                      | 4   |
| $\mu$ -FTIR(ATR)                | Oysters                                      | > 5                    | PP, PA and ABS                   | Extraction and purification increase the quality of the analysis.                                                     | Sample digestion, purification, and clean-up                                                                                             | 5   |
| $\mu$ -FTIR(ATR)                | Seawater, freshwater and wastewater          | 10 - 500               | PE, PP, PA, PS, PET, PVC         | Digestion organic matter using $\text{H}_2\text{O}_2$ / Fenton and KOH.                                               | 14 days to complete digestion and analysis process                                                                                       | 6   |
| $\mu$ -FTIR(T) and $\mu$ -RAMAN | Sea water                                    | > 1                    | PE, PP, PA, ABS, PVA, PU and PET | Purification by basic enzymatic protocol                                                                              | 13 days to complete MPs analysis                                                                                                         | 7   |
| $\mu$ -RAMAN                    | Commercial drinking water                    | $\geq 10$              | PP, PET and PA                   | Main fraction of MPs detected less than 20 $\mu\text{m}$                                                              | Sample purification and clean-up                                                                                                         | 8   |
| $\mu$ -RAMAN                    | MPs generated when opening plastic packaging | 2 - 100                | PE, PP, PS and PET               | Simple sampling method to detect MPs simultaneously. Mass changes of small particles of MPs (10-30 ng) were detected. | Complementary techniques to determine mass and composition of MPs                                                                        | 9   |
| $\mu$ -RAMAN                    | Marine atmosphere                            | 1 - 100                | PE, PP and PS                    | Filters facilitates the analysis. No need to clean-up the sample.                                                     | 1 $\mu\text{m}$ MPs were not detected                                                                                                    | 10  |
| $\mu$ -RAMAN                    | Human placenta                               | 5 - 10                 | PE, PP and PET                   | Identification was possible with a data base                                                                          | Sample purification and clean-up                                                                                                         | 11  |
| $\mu$ -RAMAN                    | River water and sediments                    | $\geq 2$               | PE, PP, PS, PET and PVC          | Nile Red was used in MPs tinction to facilitate micro-Raman identification.                                           | Sample preparation and clean-up procedures are required to use Nile Red. False positive results were registered for fluorescence effect. | 12  |

ABS: acrylonitrile butadiene styrene, PA: Polyamide, PE: polyethylene, PET: polyethylene terephthalate, PP: polypropilene, PS: polystyrene, PU: polyurethane, PVA: polyvinyl alcohol, PVC: polyvinyl chloride.

**Table 2.** Thermal analytical methods applied to the characterization of environmental samples containing MPs.

| Type of analysis      | Sample                           | Size ( $\mu\text{m}$ )                   | MPs analyzed                                   | Observations                                                                                                           | Complications                                                                                | Ref    |
|-----------------------|----------------------------------|------------------------------------------|------------------------------------------------|------------------------------------------------------------------------------------------------------------------------|----------------------------------------------------------------------------------------------|--------|
| DSC                   | Sea water                        | > 20                                     | PEVA, PP, ABS, PS, PTFE, PET, PE-LD, and PE-HD | 11 different sites were sampled.                                                                                       | Sample washing and separation                                                                | 13     |
| DSC                   | Simulated water                  | -                                        | PE-HD, PE-LD, PA and PET                       | Preheating/ cooling reduce interferences signals. LOQ from 0.05 to 0.19 mg (depending on the polymer)                  | Peak overlapping. PVC, PUR and PS are not detectable.                                        | 14, 15 |
| DSC                   | Water solutions                  | 23-256, 256-645, 645-1000                | PE-LD, PE-HD, PP and PET of different sizes.   | Melting point temperature and peak area are affected by particle size                                                  | Need of sample treatment                                                                     | 16, 17 |
| Py-GC/MS              | Sediments                        | $\leq 500$                               | PE, PP, PS, PET and PVC                        | Sediment into the matrix interfere with measurements                                                                   | The residual organic matter has a negative effect                                            | 18     |
| Py-GC/MS <sup>2</sup> | Air                              | $\leq 2.5$                               | PE                                             | High recovery (97-110%) and sensitivity (LOD = 1 pg) without sample pre-treatment                                      | -                                                                                            | 19     |
| Py-GC/MS              | River, sea, effluent water       | PS (25, 60, 1000 nm)<br>PMMA (25, 75 nm) | PS and PMMA                                    | The nanoplastics keep in their original shape and size after the cloud-point extraction step employing Triton X-45     | LOD $\geq 10 \mu\text{g L}^{-1}$ MPs                                                         | 20     |
| Py-GC/MS              | Sediment, soil and sewage sludge | 10 – 50<br>200-400                       | PE, PP and PS                                  | Pressurized liquid extraction allow analysis in less than 7 h. LOQ of $7 \mu\text{g g}^{-1}$                           | Large particles (200-400 $\mu\text{m}$ ) aggregate resulting in high deviation.              | 21     |
| Py-GC/MS              | Soil                             | 250 - 500                                | PE, PS and PP.                                 | 1,2,4-trichlorobenzene was used to dissolve PE, PP and PS. LOD from $1 - 86 \mu\text{g g}^{-1}$ . Analysis time: 2-3 h | Changes in particle crystallinity and surface properties could affect the polymer solubility | 22     |

|                     |                           |           |                                                                           |                                                                                                                                   |                                             |    |
|---------------------|---------------------------|-----------|---------------------------------------------------------------------------|-----------------------------------------------------------------------------------------------------------------------------------|---------------------------------------------|----|
| Py-MS<br>(portable) | Pelagic and demersal fish | 20 - 125  | PE, PP, PS, PET, PVC, PMMA, PC, PA and methylene-diphenyldiisocyanate-PUR | Thermochemolysis increase the reliability of mass related data. Improved sensitivity for PET and PC.                              | Sample pre-concentration                    | 23 |
| Py-MS<br>(portable) | Beach sediments           | < 5000    | PE, PP, PS and PMMA                                                       | MPs affected by environmental conditions (aging and UV) were successfully identified in less than 5 min                           | Sample extraction and purification          | 24 |
| TED-GC/MS           | Water sediments           | 145 - 198 | PE, PP and PS (LOQ of 10, 1 and 0.2 µg)                                   | A thermogravimetric furnace (TGA) is coupled to solid-phase absorbers and transferred to GC/MS. Large sample input (up to 100 mg) | Manual operation affect the reproducibility | 25 |

---

ABS: acrylonitrile butadiene styrene, PA: polyamide, PE: polyethylene, PE-HD: high-density polyethylene, PE-LD: low-density polyethylene, PET: polyethylene terephthalate, PEVA: polyethylene co-vinyl acetate, PMMA: polymethyl methacrylate, PC: polycarbonate, PP: polypropylene, PS: polystyrene, PTFE: polytetrafluoroethylene, PVC: polyvinyl chloride.

**Table 3.** Electrochemical methods or proof-of-concept applied to the characterization of solutions prepared with MPs.

| Type of analysis                                 | Sample             | Size                                       | Observations                                                               | Highlights                                                                                  | Complications                                                          | Ref       |
|--------------------------------------------------|--------------------|--------------------------------------------|----------------------------------------------------------------------------|---------------------------------------------------------------------------------------------|------------------------------------------------------------------------|-----------|
| Collision electrochemistry (Amperometry)         | Carboxylated latex | 50 nm                                      | Au planar UME and FcMeOH                                                   | Detection of insulating nanoplastic, proof-of-concept.                                      | Enhanced radial diffusion<br>Limited to low sized particles            | 26        |
| Collision electrochemistry (Amperometry)         | PS                 | 530 nm                                     | Au planar UME, FcMeOH and KCl                                              | Enhanced electromigration                                                                   | Enhanced radial diffusion<br>Limited to low sized particles            | 27        |
| Collision electrochemistry (Amperometry)         | PS                 | 1-2 $\mu\text{m}$ , 400 nm                 | Hemispherical Hg UME                                                       | No radial diffusion                                                                         | Limited to low sized particles                                         | 28        |
| Collision electrochemistry (Cathodic coulometry) | PS                 | 1-4 $\mu\text{m}$                          | Carbon fiber UME and NaCl                                                  | Size distribution, counts. Proof-of-concept.                                                | Limited to low sized particles                                         | 29        |
| Collision electrochemistry (FFT- EIS)            | PS                 | 1 $\mu\text{m}$                            | UME, FcMeOH and KCl                                                        | Size distribution, counts. Proof-of-concept.                                                | Limited to low sized particles                                         | 30        |
| Tunable resistive pulse sensor                   | PS                 | 40 nm – 10 $\mu\text{m}$                   | Ability to analyze particles with different size in one step               | Particle size and counts. Portable.                                                         | Need of calibration.<br>Membrane pores can be obstructed.              | 31,<br>32 |
| Impedance flow cytometry                         | PE                 | 300 – 1000 $\mu\text{m}$                   | Ability to solve samples containing MPs and biological particles/organisms | Particle size (range) and counts. No pretreatment for simulated seawater samples. Portable. | Limited to solve small MPs.<br>Sensitive to bubbles.                   | 33        |
| Electrochemical impedance spectroscopy           | PS                 | 0.08, 0.1, 1, 7.5, 10 and 20 $\mu\text{m}$ | Ability to analyze particles with different size and concentrations        | Chemometric analysis is needed<br>Real tap water samples were used                          | Best results were obtained for concentrations of 1 mg mL <sup>-1</sup> | 34        |

PE: polyethylene, PS: polystyrene

## References

- 1 M. Liu, Y. Song, S. Lu, R. Qiu, J. Hu, X. Li, M. Bigalke, H. Shi and D. He, A method for extracting soil microplastics through circulation of sodium bromide solutions, *Sci. Total Environ.*, 2019, **691**, 341–347.
- 2 J. N. Möller, I. Heisel, A. Satzger, E. C. Vizsolyi, S. D. J. Oster, S. Agarwal, C. Laforsch and M. G. J., C. Löder, Tackling the Challenge of Extracting Microplastics from Soils: A Protocol to Purify Soil Samples for Spectroscopic Analysis, *Environ. Toxicol. Chem.*, 2021, **41**, 844-857

- 3 C. Rathore, M. Saha, P. Gupta, M. Kumar, A. Naik and J. de Boer, Standardization of micro-FTIR methods and applicability for the detection and identification of microplastics in environmental matrices, *Sci. Total Environ.*, 2023, **888**, 164157.
- 4 E. O. Akindele, S. M. Ehlers and J. H. E. Koop, First empirical study of freshwater microplastics in West Africa using gastropods from Nigeria as bioindicators, *Limnologica.*, 2019, **78**, 125708.
- 5 F. Corami, B. Rosso, M. Roman, M. Picone, A. Gambaro and C. Barbante, Evidence of small microplastics (<100 $\mu$ m) ingestion by Pacific oysters (*Crassostrea gigas*): A novel method of extraction, purification, and analysis using  $\mu$ -FTIR, *Mar. Pollut. Bull.*, 2020, **160**, 111606.
- 6 J. Yang, M. Monnot, Y. Sun, L. Asia, P. Wong-Wah-Chung, P. Doumenq and P. Moulin, Microplastics in different water samples (seawater, freshwater, and wastewater): Methodology approach for characterization using micro-FTIR spectroscopy, *Water Res.*, 2023, **232**, 119711.
- 7 M. G. J. Löder, H. K. Imhof, M. Ladehoff, L. A. Löschel, C. Lorenz, S. Mintenig, S. Piehl, S. Primpke, I. Schrank, C. Laforsch and G. Gerdt, Enzymatic Purification of Microplastics in Environmental Samples, *Environ. Sci. Technol.*, 2017, **51**, 14283–14292.
- 8 D. Schymanski, C. Goldbeck, H. U. Humpf and, P. Fürst, Analysis of microplastics in water by  $\mu$ -Raman spectroscopy: Release of plastic particles from different packaging into mineral water, *Water Res.*, 2018, **129**, 154–162.
- 9 Z. Sobhani, Y. Lei, Y. Tang, L. Wu, X. Zhang, R. Naidu, M. Megharaj and C. Fang, Microplastics generated when opening plastic packaging, *Sci Rep.*, 2020, **10**, 4841.
- 10 M. Trainic, J. M. Flores, I. Pinkas, M. L. Pedrotti, F. Lombard, G. Bourdin, G. Gorsky, E. Boss, Y. Rudich, A. Vardi and I. Koren, Airborne microplastic particles detected in the remote marine atmosphere, *Commun. Earth Environ.*, 2020, **1**, 1–9.
- 11 A. Ragusa, A. Svelato, C. Santacroce, P. Catalano, V. Notarstefano, O. Carnevali, F. Papa, M. C. A. Rongioletti, F. Baiocco, S. Draghi, E. D'Amore, D. Rinaldo, M. Matta and E. Giorgini Plasticenta: First evidence of microplastics in human placenta. *Environ. Int.*, 2021, **146**, 106274.
- 12 J. C. Prata, J. P. da Costa, A. J. S. Fernandes, F. M. da Costa, A. C. Duarte and T. Rocha-Santos, Selection of microplastics by Nile Red staining increases environmental sample throughput by  $\mu$ -Raman spectroscopy, *Sci. Total Environ.*, 2021, **783**, 146979.
- 13 S. H. Shabaka, M. Ghobashy, R. S. Marey, Identification of marine microplastics in Eastern Harbor, Mediterranean Coast of Egypt, using differential scanning calorimetry, *Mar. Pollut. Bull.*, 2019, **142**, 494-503.
- 14 H. Bitter and S. Lackner, Fast and easy quantification of semi-crystalline microplastics in exemplary environmental matrices by differential scanning calorimetry (DSC), *J. Chem. Eng.*, 2021, **423**, 129941.

- 15 M. R. Chialanza, M. F. Samarra, S. F. Samarra and P. A. Parada, Modeling microplastic with polyethylene (PE) spherical particles: a differential scanning calorimetry approach for quantification, *Environ Sci Pollut Res.*, 2022, **29**, 2311–2324.
- 16 M. R. Chialanza, I. Sierra, A. P. Parada and L. Fornaro, Identification and quantitation of semi-crystalline microplastics using image analysis and differential scanning calorimetry, *Environ Sci Pollut Res.*, 2018, **25**, 16767–16775.
- 17 D. Sorolla-Rosario, J. Llorca-Porcel, M. Pérez-Martínez, D. Lozano-Castelló and A. Bueno-López, Study of microplastics with semicrystalline and amorphous structure identification by TGA and DSC, *J. Environ. Chem. Eng.*, 2022, **10**, 106886.
- 18 N. Bouzid, C. Anquetil, R. Dris, J. Gasperi, B. Tassin and S. Derenne. Quantification of microplastics by pyrolysis coupled with gas chromatography and mass spectrometry in sediments: Challenges and implications, *Microplastics.*, 2022, **1**, 229-239.
- 19 P. Luo, M. Bai, Q. He, Z. Peng, L. Wang, C. Dong, Z. Qi, W. Zhang, Y. Zhang and Z. Cai, A Novel Strategy to Directly Quantify Polyethylene Microplastics in PM<sub>2.5</sub> Based on Pyrolysis-Gas Chromatography–Tandem Mass Spectrometry, *Anal. Chem.*, 2023, **95**, 3556-3562.
- 20 X. X. Zhou, L. T. Hao, H. Y. Wang, Y. J. Li and J. F. Liu, Cloud-Point Extraction Combined with Thermal Degradation for Nanoplastic Analysis Using Pyrolysis Gas Chromatography-Mass Spectrometry, *Anal. Chem.*, 2019, **91**, 1785–1790.
- 21 G. Dierkes, T. Lauschke, S. Becher, H. Schumacher, C. Földi and T. Ternes, Quantification of microplastics in environmental samples via pressurized liquid extraction and pyrolysis-gas chromatography, *Anal. Bioanal. Chem.*, 2019, **411**, 6959–6968.
- 22 Z. Steinmetz, A. Kintzi, K. Muñoz and G. E. Schaumann, A simple method for the selective quantification of polyethylene, polypropylene, and polystyrene plastic debris in soil by pyrolysis-gas chromatography/mass spectrometry, *J. Anal. Appl. Pyrolysis.*, 2020, **147**, 104803.
- 23 M. Fischer and B. M. Scholz-Böttcher, Simultaneous Trace Identification and Quantification of Common Types of Microplastics in Environmental Samples by Pyrolysis-Gas Chromatography-Mass Spectrometry, *Environ. Sci. Technol.*, 2017, **51**, 5052–5060.
- 24 X. Zhang, H. Zhang, K. Yu, N. Li, Y. Liu, X. Liu and J. Jiang. Rapid monitoring approach for microplastics using portable pyrolysis-mass spectrometry, *Anal. Chem.*, 2020, **92**, 4656-4662.
- 25 R. Becker, K. Altmann, T. Sommerfeld and U. Braun, Quantification of microplastics in a freshwater suspended organic matter using different thermoanalytical methods – outcome of an interlaboratory comparison, *J. Anal. Appl. Pyrolysis.*, 2020, **148**, 104829.
- 26 B. M. Quinn, P. G. Van't Hof and S. G., Lemay, Time-resolved electrochemical detection of discrete adsorption events, *J. Am. Chem. Soc.*, 2004, **126**, 8360-8361.

- 27 A. Boika, S. N. Thorgaard and A. J. Bard, Monitoring the electrophoretic migration and adsorption of single insulating nanoparticles at ultramicroelectrodes, *J. Phys. Chem. B.*, 2013, **117**, 4371-4380.
- 28 Z. Deng, R. Elattar, F. Maroun and C. Renault, In situ measurement of the size distribution and concentration of insulating particles by electrochemical collision on hemispherical ultramicroelectrodes, *Anal. Chem.*, 2018, **90**, 12923-12929.
- 29 K. Shimizu, S. V. Sokolov, E. Kästelhön, J. Holter, N. P. Young and R. G. Compton, In situ Detection of Microplastics: Single Microparticle- electrode Impacts, *Electroanalysis.*, 2017, **29**, 2200-2207.
- 30 B. Roehrich, E. Z. Liu, R. Silverstein and L. Sepunaru, Detection and Characterization of Single Particles by Electrochemical Impedance Spectroscopy, *J. Phys. Chem. Lett.*, 2021, **12**, 9748-9753.
- 31 F. Caputo, R. Vogel, J. Savage, G. Vella, A. Law, G. Della Camera and L. Calzolari. Measuring particle size distribution and mass concentration of nanoplastics and microplastics: addressing some analytical challenges in the sub-micron size range, *J. Colloid Interface Sci.*, 2021, **588**, 401-417.
- 32 W. Anderson, D. Kozak, V. A. Coleman, A. K. Jämting and M. Trau, A comparative study of submicron particle sizing platforms: accuracy, precision and resolution analysis of polydisperse particle size distributions, *J. Colloid Interface Sci.*, 2013, **405**, 322–330.
- 33 B. C. Colson and A. P. M. Michel, Flow-Through Quantification of Microplastics Using Impedance Spectroscopy, *ACS Sensors.*, 2021, **6**, 238–244.
- 34 H. Du, G. Chen and J. Wang, Highly selective electrochemical impedance spectroscopy-based graphene electrode for rapid detection of microplastics, *Sci. Total Environ.*, 2023, **862**, 160873.
